# Supplementary material for: Sequence-selective assembly of tweezer molecules on linear templates enables frameshift-reading of sequence information
Source: Springer Nature journal article supplement (doi:10.1038/nchem.699), 2010-06-27
Supplement: 41557_2010_BFnchem699_MOESM17_ESM.mol [file 41557_2010_BFnchem699_MOESM17_ESM.mol]

  ChemDraw06081012162D

 51 60  0  0  0  0  0  0  0  0999 V2000
   -2.5062   -0.8231    0.0000 C   0  0  0  0  0  0  0  0  0  0  0  0
   -1.0744   -1.6513    0.0000 N   0  0  0  0  0  0  0  0  0  0  0  0
   -3.2221   -2.0640    0.0000 C   0  0  0  0  0  0  0  0  0  0  0  0
   -3.2221   -2.8894    0.0000 C   0  0  0  0  0  0  0  0  0  0  0  0
   -2.5062   -3.3021    0.0000 C   0  0  0  0  0  0  0  0  0  0  0  0
   -1.7903   -2.8894    0.0000 C   0  0  0  0  0  0  0  0  0  0  0  0
   -1.7903   -2.0640    0.0000 C   0  0  0  0  0  0  0  0  0  0  0  0
   -2.5062   -1.6485    0.0000 C   0  0  0  0  0  0  0  0  0  0  0  0
   -0.3595   -2.0640    0.0000 C   0  0  0  0  0  0  0  0  0  0  0  0
   -0.3595   -2.8894    0.0000 C   0  0  0  0  0  0  0  0  0  0  0  0
    0.3553   -3.3021    0.0000 C   0  0  0  0  0  0  0  0  0  0  0  0
    1.0701   -2.8894    0.0000 C   0  0  0  0  0  0  0  0  0  0  0  0
    1.0701   -2.0640    0.0000 C   0  0  0  0  0  0  0  0  0  0  0  0
   -1.8402   -0.4102    0.0000 O   0  0  0  0  0  0  0  0  0  0  0  0
    0.3553   -0.7709    0.0000 C   0  0  0  0  0  0  0  0  0  0  0  0
    0.3553   -1.6513    0.0000 C   0  0  0  0  0  0  0  0  0  0  0  0
   -0.3400   -0.3582    0.0000 O   0  0  0  0  0  0  0  0  0  0  0  0
   -3.2221   -0.4104    0.0000 O   0  0  0  0  0  0  0  0  0  0  0  0
    1.0793   -0.3585    0.0000 O   0  0  0  0  0  0  0  0  0  0  0  0
   -3.2221    2.8896    0.0000 C   0  0  0  0  0  0  0  0  0  0  0  0
   -3.2221    2.0646    0.0000 C   0  0  0  0  0  0  0  0  0  0  0  0
   -2.5076    1.6521    0.0000 C   0  0  0  0  0  0  0  0  0  0  0  0
   -1.7931    2.0646    0.0000 C   0  0  0  0  0  0  0  0  0  0  0  0
   -1.7931    2.8896    0.0000 C   0  0  0  0  0  0  0  0  0  0  0  0
   -2.5076    3.3021    0.0000 C   0  0  0  0  0  0  0  0  0  0  0  0
   -1.0787    1.6521    0.0000 C   0  0  0  0  0  0  0  0  0  0  0  0
   -0.3642    2.0646    0.0000 C   0  0  0  0  0  0  0  0  0  0  0  0
   -0.3642    2.8896    0.0000 C   0  0  0  0  0  0  0  0  0  0  0  0
   -1.0787    3.3021    0.0000 C   0  0  0  0  0  0  0  0  0  0  0  0
   -3.9365    1.6521    0.0000 C   0  0  0  0  0  0  0  0  0  0  0  0
   -3.9365    0.8271    0.0000 C   0  0  0  0  0  0  0  0  0  0  0  0
   -3.2221    0.4146    0.0000 C   0  0  0  0  0  0  0  0  0  0  0  0
   -2.5076    0.8271    0.0000 C   0  0  0  0  0  0  0  0  0  0  0  0
   -1.7931    0.4146    0.0000 C   0  0  0  0  0  0  0  0  0  0  0  0
   -1.0787    0.8271    0.0000 C   0  0  0  0  0  0  0  0  0  0  0  0
    1.0787    2.8854    0.0000 C   0  0  0  0  0  0  0  0  0  0  0  0
    1.0787    2.0604    0.0000 C   0  0  0  0  0  0  0  0  0  0  0  0
    1.7931    1.6479    0.0000 C   0  0  0  0  0  0  0  0  0  0  0  0
    2.5076    2.0604    0.0000 C   0  0  0  0  0  0  0  0  0  0  0  0
    2.5076    2.8854    0.0000 C   0  0  0  0  0  0  0  0  0  0  0  0
    1.7931    3.2979    0.0000 C   0  0  0  0  0  0  0  0  0  0  0  0
    3.2221    1.6479    0.0000 C   0  0  0  0  0  0  0  0  0  0  0  0
    3.9365    2.0604    0.0000 C   0  0  0  0  0  0  0  0  0  0  0  0
    3.9365    2.8854    0.0000 C   0  0  0  0  0  0  0  0  0  0  0  0
    3.2221    3.2979    0.0000 C   0  0  0  0  0  0  0  0  0  0  0  0
    0.3642    1.6479    0.0000 C   0  0  0  0  0  0  0  0  0  0  0  0
    0.3642    0.8229    0.0000 C   0  0  0  0  0  0  0  0  0  0  0  0
    1.0787    0.4104    0.0000 C   0  0  0  0  0  0  0  0  0  0  0  0
    1.7931    0.8229    0.0000 C   0  0  0  0  0  0  0  0  0  0  0  0
    2.5076    0.4104    0.0000 C   0  0  0  0  0  0  0  0  0  0  0  0
    3.2221    0.8229    0.0000 C   0  0  0  0  0  0  0  0  0  0  0  0
 18  1  1  0      
  3  4  2  0      
  4  5  1  0      
  5  6  2  0      
  6  7  1  0      
  7  8  2  0      
  3  8  1  0      
  2  7  1  0      
  2  9  1  0      
  9 10  2  0      
 10 11  1  0      
 11 12  2  0      
 12 13  1  0      
 13 16  2  0      
 16  9  1  0      
  1  8  1  0      
  1 14  2  0      
 15 16  1  0      
 15 17  2  0      
 48 19  1  0      
 32 18  1  0      
 15 19  1  0      
 20 21  1  0      
 21 22  2  0      
 22 23  1  0      
 23 24  2  0      
 24 25  1  0      
 25 20  2  0      
 23 26  1  0      
 26 27  2  0      
 27 28  1  0      
 28 29  2  0      
 29 24  1  0      
 21 30  1  0      
 30 31  2  0      
 31 32  1  0      
 32 33  2  0      
 33 22  1  0      
 33 34  1  0      
 34 35  2  0      
 35 26  1  0      
 36 37  1  0      
 37 38  2  0      
 38 39  1  0      
 39 40  2  0      
 40 41  1  0      
 41 36  2  0      
 39 42  1  0      
 42 43  2  0      
 43 44  1  0      
 44 45  2  0      
 45 40  1  0      
 37 46  1  0      
 46 47  2  0      
 47 48  1  0      
 48 49  2  0      
 49 38  1  0      
 49 50  1  0      
 50 51  2  0      
 51 42  1  0      
M  END
